# Supplementary material for: Phosphoproteomics Reveals Selective Regulation of Signaling Pathways by Lysophosphatidic Acid Species in Macrophages
Source: MDPI journal article supplement (doi:10.3390/cells13100810), 2024-05-09
Supplement: s1 [file s1]

## **Supplemental Figures**

### **Phosphoproteomics reveals selective regulation of signaling pathways by lysophosphatidic acid species in macrophages**

Raimund Dietze<sup>1</sup>, Witold Szymanski<sup>2,3</sup>, Aditya Bhagwat<sup>2,3</sup>, Kaire Ojasalu<sup>1</sup>, Florian Finkernagel<sup>1,4</sup>, Andrea Nist<sup>5</sup>, Thorsten Stiewe<sup>5</sup>, Johannes Graumann<sup>2,3</sup> and Rolf Müller<sup>1\*</sup>

<sup>1</sup>Department of Translational Oncology, Center for Tumor Biology and Immunology, Philipps University, Marburg, Germany

<sup>2</sup>Institute of Translational Proteomics, Biochemical Pharmacological Centre, Philipps University, Marburg, Germany

<sup>3</sup>Translational Proteomics Core Facility, Philipps University, Marburg, Germany

<sup>4</sup>Bioinformatics Core Facility, Philipps University, Marburg, Germany

<sup>5</sup>Genomics Core Facility, Philipps University, Marburg, Germany

\*Author to whom correspondence should be addressed.

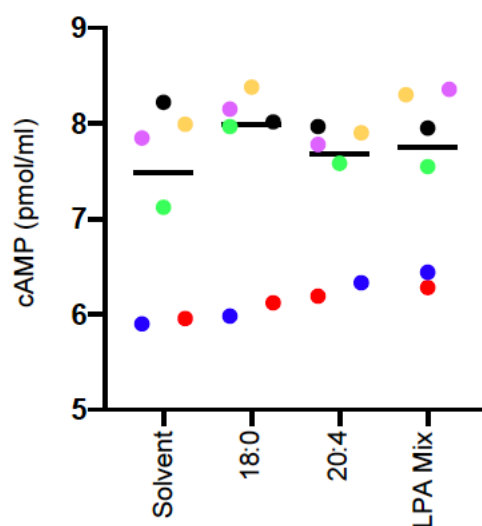

**Figure S1:** Concentration of cAMP in MDM lysates after stimulation with 5  $\mu$ M LPA or solvent (EtOH) for 15 min measured by competitive enzyme immunoassay. Each dot represents a biological replicate (n=5). Horizontal lines represent the median. The p values obtained by two-sided, paired t-test indicate non-significance across all treatments compared to the solvent control.

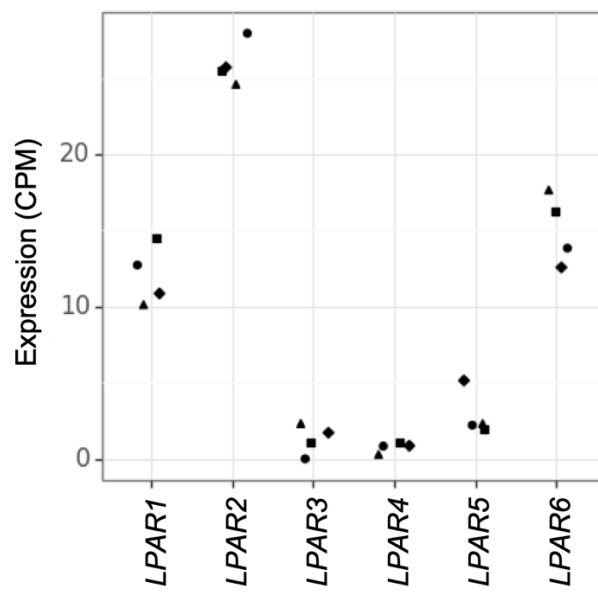

**Figure S2:** Expression of *LPAR* genes in non-polarized (M0) MDMs determined by RNA-Seq. Each symbol represents a biological replicate (n=4 donors).

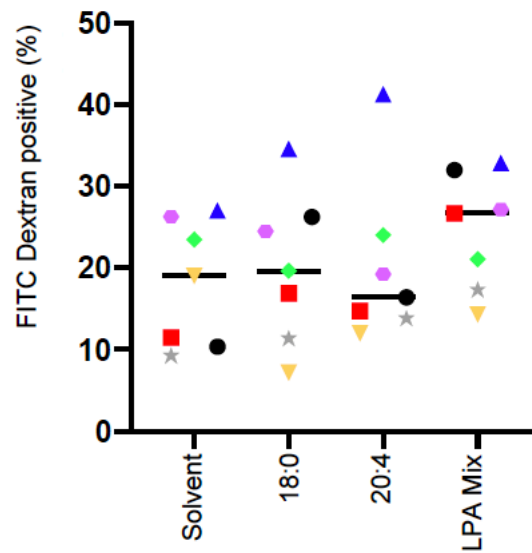

**Figure S3:** Flow cytometric analysis of FITC-Dextran macropinocytosis by MDMs treated with 5  $\mu$ M LPA or solvent for 24 h. Untreated MDMs incubated on ice to invoke a complete inhibition of pinocytosis were used as negative control for gating. Each symbol represents a biological replicate (n=7). Horizontal lines represent the median. The p values obtained by two-sided, paired t-test indicate non-significance across all treatments compared to the solvent control. .
